# Supplementary material for: The LMO2 -25 Region Harbours GATA2-Dependent Myeloid Enhancer and RUNX-Dependent T-Lymphoid Repressor Activity
Source: PubMed Central journal article supplement (PMC4498896; doi:10.1371/journal.pone.0131577), 2015-07-10
Supplement: pone.0131577.s001.pdf [file pone.0131577.s001.pdf]

human : GGCCTAAAACCTTCTAGAGGGTCTCACTCTAAAGATAACCC-AAAGGTCTCACAGCTTCCCTGGTTC : 66  
mouse : AGCCTGGAA-CTTCTCCAGGATCTTATTCTAAAGACACCCCTCAGGACCTTGCTGCTTCTGGCTAC : 66  
cow : AGCCTAAAACCTTCTGAGGGTGTTACTCTAAAGATAACCCAAAAGGTCTCATAGCTTCTGGTTCGT : 67  
dog : GGCCTAAAACCTTCTGAGGGTCTCACTCTAAAGATAACCCAGAAGGTCTCCTAACTTCTGGTTCGT : 67  
cat : AGCCTAAAACCTTCTGAGGGTATCACTCTAAAGATAACCCA-AAAGGTCTCATAGCTTCTGGTTCGT : 66

human : AAAAAAGACA---ACAGGAGCAAGGATTGAGACCTAAAGATCATTTGGGTAGAAATGAGGAAAGAAA : 130  
mouse : TCAGA---TGTGTACAGTAGCAGGACTTGAGACCTGAAGATCAGTGGGTAGAAATGAGGAAAGAAA : 130  
cow : TAAAAACAACAACCTACAGTAGCAGGAAATTGAGACCTAAAGATCAGCAGAGTAGAAATGAGGAAAGAAA : 134  
dog : TAAAAACAGCAACTACAGTAGCAGGAAATTGAGACCTACAGATCAGTGGCTAGAAATGAGGAAAGAAA : 134  
cat : GAAAAACAGCAACTCCAGTAGCAGGAAATTGAGACCTACAGATCGGTGGGTAGAAATGAGGAAAGAAA : 133

human : TGACATGTTAAATGATGATTTT-TCCCTAAC-TTGGCCTGTTCTTTCTAGATGTGGCTCAAGAACTT : 195  
mouse : TGACATGTTCCATGACTACTG--TCCCAGCTTGTCTTCTCTTTCTAGATACAGCGC-AGACCTC : 194  
cow : TGGCATGTTGAATGACTATTTT-TCCCCAAC-TGGCCCTATTCTTTCTAGATATAGTCCCAGAACTT : 199  
dog : TGGCATGTTAAATGACTCTTTTCTCCCAGC-TTGGCCTGTTCTTTCTAGATATAGCCC-AGAACTT : 199  
cat : TGGCATGTTAAATGACTATTTCTCCCAGC-TTGGCCTGTTCTTTCTAGATATAGCCC-AGAACTT : 198

human : GCAGAGTTATGTTGGGATAATTCGACTGATCAAAGCTGAAAGT---TTTCCCTATCGACTTCAAGGC : 259  
mouse : ACATGGCTATAGTACTTGTCTGGC---CAAAGTGGAAAGGTTTCTTTCTATCTGTTTCAAGGC : 257  
cow : GCATAGTTACAGTGGGATAATTTGATCGATCAAAGCTGAAAGT---TTT-CTGCCAAGGTTCAAGGC : 262  
dog : GAATAGTTACAGTGGGATAATTTGAT---CAAAGCTGAAAG---TTTTCTATCAATTTCAAGGC : 258  
cat : GCATAGCTACAGTGG-----GAT---CAAAGCTGAAAG---TTTTCTATCAATTTCAAGGC : 249

human : TGTTCAAATCTCTATGTACTTTGAAGTCTGAGGCACAAAGATAATTTCCAGAGATTCATGTTCTAT : 326  
mouse : TGCTTAAATCT-TATACGTTT-----TGAGATGCAATAGGATTCCTGGAAATTCATATGCTCT : 316  
cow : TGTTCAAAACCTGAAGTACTTCAAAGTCTGGGGTGTAGTGGAAATTCCTAAGAAATTTATGCCTTTAT : 329  
dog : CGTTCAAATCTCTATGCACTTTGAAGTCTGGGGTGCAGTGGAAATTCCTGGGACATTTGTGCTTCTGT : 325  
cat : TGITCAACTCTCTATGTACTTTGAAGTGT-GGGTGCAGTAGAATTCCTGGGACATCTATGCTTCTAA : 315

human : CGATGCTAGGCTGGGCTGACACAAGATAACCCCTCAAGAGGCCCTTTC-CGAACTGCTGTATAAACTGT : 392  
mouse : CTAATTTGGGCTGGTTTGGCATTGATCTCTCTTC-----CCAAAGACATTTGT----- : 363  
cow : CTCTGTTAGGCTGGTTTGGACACAAATACCCCTCTAGGAGGCCCTTCGCAAGCCACCATGTAATTTCT : 396  
dog : CCCTGCTAGGCTGATTTGGACACGGATACCCCTCGGGAGGCCCTTCCCAGCCCCTGTGTGAAGTGC : 392  
cat : CTCTGCTGGGCTGATTTGGACACAGATTCGCCCTCAGGAGGCCCTTCCCAGCCACTGTGCAAACTGT : 382

human : CCTGGGTCCAGCAATAAAGCAACTGTGTCATTAAGTTCTCTGCCCTTCAGAAGATCTGATCTTAAT : 459  
mouse : --AGGGCCAGCCATAAAGAAACTATGTTCTTAAGGCCCTCTGCCCTTGAGGGCAGAT----- : 419  
cow : CCTAGGCCA-CAACGAAG---TGTGTTCTCGTAGCCTTCTGCCCTCC-GAGGATCTCATTTTAAT : 457  
dog : C-CTGGGCCAGCGGTAAAGCCTGCGTCCCGTTACAGCCCTCTGCCCTTCAAAATCCTAGT----- : 453  
cat : C-CTTGGCCAGCAGTGAAGCCAGTGTACCATTAACCTTCTCTGATCTCAGAAGATAATTAAC---TG : 445

human : ACCCTTCTCTCTTTTGTCC--CTCTGATTTTCATCAAATTTGTTGCCATTCT----- : 510  
mouse : -----CTGATCTTAATGTACTCCCAACTCCATCTGATCTGTTGTAACAT----- : 464  
cow : TCC---TGCCCTTTTGTCCCTTTCTGGTTTCATTAATTTGTTGTCACCTTTGGCTCTTTTCTTTT : 521  
dog : GCCCTCCGCTTCTTATTGTCCATTTCTGGTTTCATCAAATTTGCTGCCGCTTTGC----- : 508  
cat : TACCTTCACTACTTATTGTCC-----TTTCATCAA-TAGCTGCCACTTGG----- : 491

human : ----- : -  
mouse : ----- : -  
cow : TTTGTTGTTTTTCAATTTTTATTTGGCATATGATTGCTTTCGAAGTTGTGTTAGTTTCTACTGTACAGCA : 588  
dog : ----- : -  
cat : ----- : -

## 5' T-cell repressor module within element -25

human : -----GGGTGTTTCTTCCTTCTCTCCCGACITTTT : 540  
 mouse : -----TTCTCTCCCAATTCT-----TTC : 483  
 cow : AAGTCAGCTATATATATACATATATACCCCTCTTTTTTGGATCTTTCTCCCTCTCTCTTCCATTTTT : 655  
 dog : -----TTCTTTCTCAGTCTCTCTCTCACATTTTT : 536  
 cat : -----TTCTTTCTCCCTCTCTCACCGCATCTTT : 519

### LEF

human : CTACTTCAGATCAAAAGAACTTCCCTTTTCCCACTTTTGGATTTCGGCCCTGGAGGACAACGCAAG : 607  
 mouse : CTACTTCAAATCAAAAGAACT-----CATCCTTATGACTGGATTCAACCCTTGAGGGCAATGCAAG : 544  
 cow : CTATTTTCAGTCAAAAGGAGCTCTCCATTTCTCCTCACTCCTGAAATTACTCCCTGGAGGCAATCCAG : 722  
 dog : CTACTTTAGATCAAAAGAACTTCCCATTTCCCACTTCTGGATTTCCTCCCTGGAGGGCAAAGCGAA : 603  
 cat : ATACTTCAGATCAAAATGTTTTGCCCACTTCCCGCTTTTCGGATATACTCCATGAAGGGCAAAGCAAG : 586

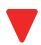

human : GTTAACCTCCCTCCACCTCTCTCTGTAGGCACACAGGGTGCCTTAGCC----- : 658  
 mouse : GTCCGGCTTGTTCCTGCTCTCTGTCCAGGCA-TCAGGGCTCTAAC----- : 590  
 cow : -----TGATTTCCCATCTCTCTTTCCAGGCACACAGGGTGTCTCTTAGCTG----- : 768  
 dog : CCT-----CTTTTTCCAGGCACACAGGGTGG-AGGCAG-----ATGCGGGGGGGGGCGGGG : 652  
 cat : GCTAAG-TCCTTCTCCGCTCTTTCCGTCTCA-ATTCCGCTCTCTTAGCGTTGGGCAGGGGTGGGG : 651

human : ---AGCGAAATCTCCG-----GCCGAGATCTCTCACAAATTCAGGCT-GGTCAATTCT : 710  
 mouse : -TTTACAAAATCTGCAAC-----CTCAGAGCTACCCACAGAGCTGCAGGCTCAAACCGGTAA : 646  
 cow : ---AATAAGATCCCAACCCAGCCCCAACCAGAGAG-CTCTGGCAATTCAGGC-----TTGT : 823  
 dog : AGTGGGG-TATCTCCA-C-----CCACTGTGGGCCCTCACGGCTTCAGGCTC-CCGAGCTGG : 706  
 cat : TGGGGGGGAGATCTCCACC-----CCGCTGTGAGCTCTCAGAGATTCAGGCAC-CTGAGCTGG : 707

### 5' RUNT

human : AGTAGGAGACATGGTTTAGTTTGAATGTGGTTAAGTCAGTCAATCATGGCATCTTCTGTTACCCTCAGCCC : 777  
 mouse : CAAAGAGAAAGGGGGTTGGTTTGAATGTGGTTAAGTCAGTCAATCATGGCATCTTCTGTTACCCTCAGCCC : 712  
 cow : AGCAAGAGTAAAGCTTTAGTTTGAATGTGGTTAAGTCAGTCAATCATGGCATCTTCTGTTACCCTCAGCCC : 890  
 dog : GGCAGCAGAAAAGGTCTAGTTTGAATGTGGTTCCCATCTGCCATCACTGCCCTCTGGTCTCTCTGTGCC : 773  
 cat : GGCAGGAGAAAAGGTCTAGTTTGAATGTGGTTCCCGTCAGCCATCACTCTCTCTCATACTGTCTGCC : 774

human : CAAACCGCTCTCTACTCATCACCCCTCACTTT-CATTTCTTTGGAT-----TATCTTTTCA : 831  
 mouse : TAAACCACTCTCTCTGCTCAACCCTCAGCCTGCACTGGGCTCTGGGGATGAATGCATGATAGACTTCA : 779  
 cow : CAAACCACTCTGGGGTACATCACCCCTCACTTTCCATTTCTCTGGAT-----TATCTTTTCA : 945  
 dog : CCAGCCCTCTCTCTGTGCACCCCTCATATTCACGGCTCTGG-----ATTAAGCTTTCC : 830  
 cat : CAAACCTCTCTCTTAC-CGCCACCGTCACTTCCAGTTCTCTGG-----GTTAGAGCTTTCC : 830

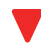

human : TCGGCTTACCAC CAGCCTTCACAGCCTCACCCAAGGCTGAAGC-AGGGCTAGCAGGGCTGGTGGCGT-- : 895  
 mouse : CAGCCTCACCA-----GAGACTGAAGCAGGACCCACGGCTGGGGCAGGGGC : 825  
 cow : TCTGTTCACCACTAACCCTCACAGCCTCACCCAAGGCTGAAGCGGGGGCCAGCAGGGTGGTACGC-- : 1010  
 dog : TCTGTTCACCACT-----TCCT-----CAAAGCAGGGGCCAGCAGG----- : 865  
 cat : TCTGTTTTACCAC-----TCCTGGGAGGCTAAAGCAGGGGCCAGAGGGGAGATGCA--- : 880

## 3' myeloid enhancer module within element -25

human : ---TTCCCTTCCCTGGTTGAGCTGGTGACTGCTGTGGCT-AAGCAGGTC AATGTGAACTCAATTTTA : 958  
 mouse : ACTATCATTTTTTCCCTGAATTCTTGGGTGCTTAGGCC-GGCTCAGCCTCGG-----GA : 878  
 cow : ---TTCCTTCTTGGTTGAAATACTAAGTCTGTGGCTAAAGCCATTCCTTTTCGGACTCA---TTA : 1071  
 dog : -----TGAAGTCTGACTGCTGTGGCT-AAGCCATCCAGGTCCTGCTCAT---GA : 912  
 cat : --TTTCCTTTCCTGGCTAAAATACTGACTGCTGTGGCT-AAGCCATTCCTGGTCTGCAAT---TA : 941

### IRF1

### ETS

human : CATT-----GAGAAAGAGAAAGCAAGAGTGACT--GGGCTGCTAAGACTGTTGCTTCATGGTTTCC : 1017  
 mouse : TTGGGACCAAGAGAAAGAGAAAGTGAGAGCAAGC-ACTGGAGCAAAGGCTGTTGTTACACAGTTTCC : 944  
 cow : CAGGGAACAAAGAGAAAGAGAAAGCAAGAGTAAGC----GCTGCAAAGACTGCTGTTACATGGTTTCC : 1134  
 dog : CAGGGAACAAAGAGAAAGAGAAAGCAAGAGGGAAT-GGGCTGCAAAGACTGTTGTTGATGGTTTCC : 978  
 cat : CAGGGAACAAAGAGAAAGAGAAAGCAAGAGTGACGGGGCTCAAAGACTGTTGTTGATGGTTTCC : 1008

### ETS

### 3' RUNT

human : CCTAAGCCCCAGAAATAGAAAGGCAGACTTCCGACTGGCAGAGCCCGTATGCTAACCACCAGACCAC : 1084  
 mouse : CTTTACGCCCCAGAAATAGAAAGGCAGACTTCCGACTTGCAGAGCCCTGTGCAAACCACCTAGACCAC : 1011  
 cow : CTTAAGCCCCAGAAATAGAAAGGCAGACTTCCGACTTGCAGAGCCCTGTGCGAACCACCAGACCAC : 1201  
 dog : CTTAAGCCCCAGAAATAGAAAGGCAGACTTCCGACTTGCAGAGCCCGCACGCAAACCACCAGACCAC : 1045  
 cat : CTTAAGCCCCAGAAATAGAAAGGCAGACTTCCGACTTGCAGAGCCCGCTGTGCAAACCACCAGACCAC : 1075

### GATA

human : ACTGCCAGATAAGAAAAATGTTTCGATTGTGTCATACTTCCCTCATTGGCTCCAGTGTCTGAAAAATGG : 1151  
 mouse : ACTGCCAGATAAGAAAAATGTTAGATTGTGTCATACTTCCCTTCATGGGCTGCAGCTTCTGCAAAATGC : 1078  
 cow : ACTGCCAGATAAGAAAAATGTTTCGATTGTGTCATACTTCCCTTCATCAGCGCTAGTTTCTGAAAAATGG : 1268  
 dog : ACTGCCAGATAAGAAAAATGTTAGATTGTGTCATACTTCC-----AGCCCAGTTTCTGAAAAATGG : 1106  
 cat : ACTGCCAGATAAGAAAAATGTTAGATTGTGTCATACTTCC-----AGCTCCAGTTTCTGAAAAATGG : 1136

human : CCTGAATTTTCAGAGAGTCTTACCATGACCCAGGATTTAGAGAGCATCGAAGAGGGA-----G : 1210  
 mouse : CCTGTGTGTCAGAGAGTCTAAGGAA-----TGACATCTAAGGGCTAGATGGAGAA-----A : 1132  
 cow : CTCTGAGTTTTCAGAGAGCCCGGCCATGATCCTAAGATTAAGAGAAGATGAAAGAGGAA-----A : 1327  
 dog : CCTGAATGTCCAGAGAGTCCGCCATGACCTAAGATTCAGAGAAGGCGAGGAAGGT-----G : 1165  
 cat : CCTGAATGTCAGAGAGCTTACCACGATTCTAAAA-TACAGAGAAGATGGAAGAGGTTGGGGAGTGG : 1202

human : GACAAAAGGATCAGGCACCTTCTCTCTCTTTCTGGG--TAAATTTAATTTTCAACCACAAAAGT : 1275  
 mouse : GCCAACAGAGACTGT-----TGCTCTCTCTTTCTGGTT-ATAGGTTTATGTTAACCACATAAGG : 1191  
 cow : GAAGAAGGGATCAGA-----TCTCTCTCTTTCTAGGTA--TAAGTTTATTTTCAACCACATAAGT : 1385  
 dog : GACAAAAGGGATCAGG-----CCTCTCTCTATTCTGGTATCTGAATTTAATTTTCAATCACAGAAAT : 1225  
 cat : GGCCAAGGGATCAGG-----CACCTCTCTATCCTGGTA-----TTAATGTCAGCCACAAAAAA : 1255

human : AAAAGGAAAGAAAAAGTCAACAACAGATGACTT----- : 1306  
 mouse : AAAGGGGAG-----CTCACAACAGCATG----- : 1214  
 cow : AAAGGGAAGGGAAAGATTATGAGAGATTAGAC----- : 1416  
 dog : AAAGCAAAGCAAACATCATGAAGTGTGGT----- : 1255  
 cat : CAAAGAAAA-AAAATATTATGAAAGATTACTCATGAGCTTTCTTTTTTATATAAAAAATTGCTAATGTT : 1321

human : ----- : -  
mouse : ----- : -  
cow : ----- : -  
dog : ----- : -  
cat : TGTATTCATTTTTGAGAGATAGAGACAGGATGTGAGTGGGGGAGGGGCAGTGAGAGAGGGAGACACA : 1388

human : ----- : -  
mouse : ----- : -  
cow : ----- : -  
dog : ----- : -  
cat : GAATCTGAAGCAGGCTCCAGGCTCTGAGCTGTCAGCACAGAGCCCTACGTGGGGCCCCGAACCCATGA : 1455

human : -----ATGA : 1310  
mouse : -----AGCGA : 1219  
cow : -----GTGA : 1420  
dog : -----CGTGA : 1260  
cat : ACCGTGAGATCACGACCTGAACGGAAGTCAGCCGCTTAACTGACTGAGCCACCCAGGCACCCCATGA : 1522

human : GCTAACTTTCTGATTTGCACATGTAA-----GAGAAAAGAAATGAACTGGATATCATTAGACA : 1367  
mouse : GCTAACTTAAATATTTGCATGTATGA-----GAGAGGAAAACCTAATT----- : 1261  
cow : GCTAACTTTT---ATTTGCCAAAAGAAATTTTTTATTTGCAAGAGAAATGAATTGGACATCAACAGGCA : 1484  
dog : GCTAACTTTCTGAATTGCACGTACA-----AGGAAGGAATGAGCTGGATGGCAACACGTA : 1315  
cat : GCTAACTTTCTTAATCGCATGTACAA-----GAGGAGGAAATGAACTGGATATGAACAAGCA : 1579

human : TTGAGAAAGGGAGTCT-CCAAGCT---AGCAATGTATCTTCGGCCTTTTTTGATTTACACGTGTTTAT : 1430  
mouse : -----GGAGTCT-CCTAGCTA--GCTCCGTGGCCCTTGACATTTTTCAGTCCCCGTATACTTAT : 1316  
cow : TTGAGAAAGGGAGCCT-GCCAGTTTAAAAAAATGTGTCCTTGGTCTTTTTCAATTCCTGTGTTTAT : 1550  
dog : TTGATGAAGGGAATCC-ACTAGCTT--AAAAACATCTCCTTGGCCTTTTTCAGTTCGTGCGCGCTCAT : 1379  
cat : TTGAGAGTGGGAATCCAACCTAA-----AAAAATGTCCTCCTTGGCCTTTTTCAATTTGTGCGTGTTCAT : 1641

human : TTA-TGAGTACCTACTGTGTGCCAGGCATGA--TGCTTGGTGCTGCCAATTCAAAGAGAAATAAGAC : 1494  
mouse : TTATCAAGTACCAACTGGTACCAGCTGCC---ACATTAGTACTGCAGATTTTTGGTG-CAGAACA- : 1378  
cow : TTATTGGTGCCTGCTCTATGCCAAGGGCTG--TGCTTATGTGCTGCAAATCCAAGAG-GATGAGGC : 1614  
dog : GCATTGAGTGCCAACTGTATGCCAAGCACAGTTTGCTTGGCGCTACGGATTTCGAAGAG-GATGGGAC : 1445  
cat : TTATTGAGTACCGACTGTATGCCAACCAG---TGCTTGGTGCTGTGGATTTGAAGAG-GACCATAC : 1704

human : ACCTCCTTGCAAAGTGACAAGGCAGAACTAGATTCAGATTCACCTAGATTTCAACTCTTGTGCTCAG : 1561  
mouse : -----GGGAGGCTGGCCCAAGTCAGATTCACCTAGATTCACCTA-TGGGCTCAG : 1428  
cow : ATCTGTTACAGAAACAAGGAGGCTGGACTAGATTCAGATTCACCTAGATTCCAACTCATGTGCTCAG : 1681  
dog : ATCATCGC-----AGGAGCCTGGACTATATTCAGATTCACCCGATTCCAACTCTTGTGCTCAG : 1504  
cat : ATTGCAGA-----CTGAGGCCGGACTATATTCAGATTCACCCAGATTCCAACTTTTGTGCTCAG : 1763

human : CACCACC-CACCATGGAAA-AATTTTCCTT-A-TCT---CCCAGAGCAGCCCGGGCAGGCGTGT : 1625  
mouse : --TACCACCTGC-ACCATGGAAAATAATTTCCCTTCATTCTTTCCCAGAGCAGCCTCAGCAGGCTCCC : 1492  
cow : --CATCACCTCCACCACCAAAAATAATTTTACTCCACTCT---CCCAGAGCAGACTTGGTGGGCACCT : 1743  
dog : --CATTACCTCCACCGTGGAAAATAATTTTGCCTTCTGTGT---CCCAGAGCAGCCCGGGCAGGCGCCT : 1566  
cat : --CACTACCTCGGCCATGGAAAATCATTTTGCCTGCTTCT---CCCAGAGCAGTCTCCGCGGGCGCCT : 1825

human : GTGTTGTCAGACACTGCAAGGAGAGTGATGGCCTGGGTGTTGACAGGCTCCTAATTGGAAGGTAGGA : 1692  
mouse : GTGTTGTCAGCCACTATAGGAAGAGTGATGGTCTGGGTGTTGACAGGCTCCTAATTGGAAGGTAGGA : 1559  
cow : GTGCTGTCAGCTCTGTCAGGACGAGTGATGGCCAGTTACTGACAAGCTCCTAATTGGATGGTAGGA : 1810  
dog : GTGTTGTCAGCCGCTCCAGGAGGAGTGATGGCCAAAGGTGTTGACAAGCTCCTAATTGGAAGGTACGA : 1633  
cat : GTGTTGTCAGCCGCTCTAGGAAGAGTGATGGCCGGGTGTTGACAAGCTCCTAATTGGAAGGTAGGA : 1892

human : GGTGCCACCAGAGATCAGCTATAAAA**GA**-**TATC**TTTGGACTGGGGTGGGCTGCTAATGCTT**GGAA**GA : 1758  
mouse : GGTGCCGCCAGAGATCAGCTATAAAA**AGT**-**TATC**TTTGGATGGGGTAGGCTGCTGATGCTCAGAAGA : 1625  
cow : GGTACC-----ATCAGCTATAAAA**AGT**-**TATC**TTTGTACTAGGCTGGGCTGCTTATGCTCAGAAGA : 1870  
dog : GGTGCCGCCAGAGATCAGCTATAAAA**AG**-**TATC**TTTGGCCGGGGTGGGCTGCTAATGCT--GCAAG : 1697  
cat : GGTGCCGCCAGATCAGCT**C**TAAA**AG**A-**TATC**TTTGGCCAGGGTGGGCTGCTAATGCT--**GA**AG : 1956

human : GACTTGT-**GGGTGAGGCC**CGGTGAGCTGTCAC**CTC****GGAA**TTGGG : 1801  
mouse : GAATTAG-**GGGTGAGGTGG**GGTGAGCTGTCAG**CC**TGGGACAGGG : 1668  
cow : GACTT**CGA**GGGTGAG**CC**TGGTGAGCTGTC**CA**CC**TGGG**GTAGGG : 1914  
dog : AGACT**CG**-**GGGTGAGGCC**TGGTGAGCTGTC**CA**CC**TGGG**ATGGGG : 1740  
cat : AGACT**CG**-**GGGTGAGGCC**TGGTGAGCTGTC**CA**CC**TGGG**AGGGG : 1999
